# Supplementary material
Source: MDPI journal article supplement (https://www.mdpi.com/1999-4907/12/4/391)

**S2: Visualization of three point clouds used in the "real life example", from left to right the point cloud alone, the point cloud with the skeleton, detail of the point cloud and detail of the point cloud with the skeleton.**

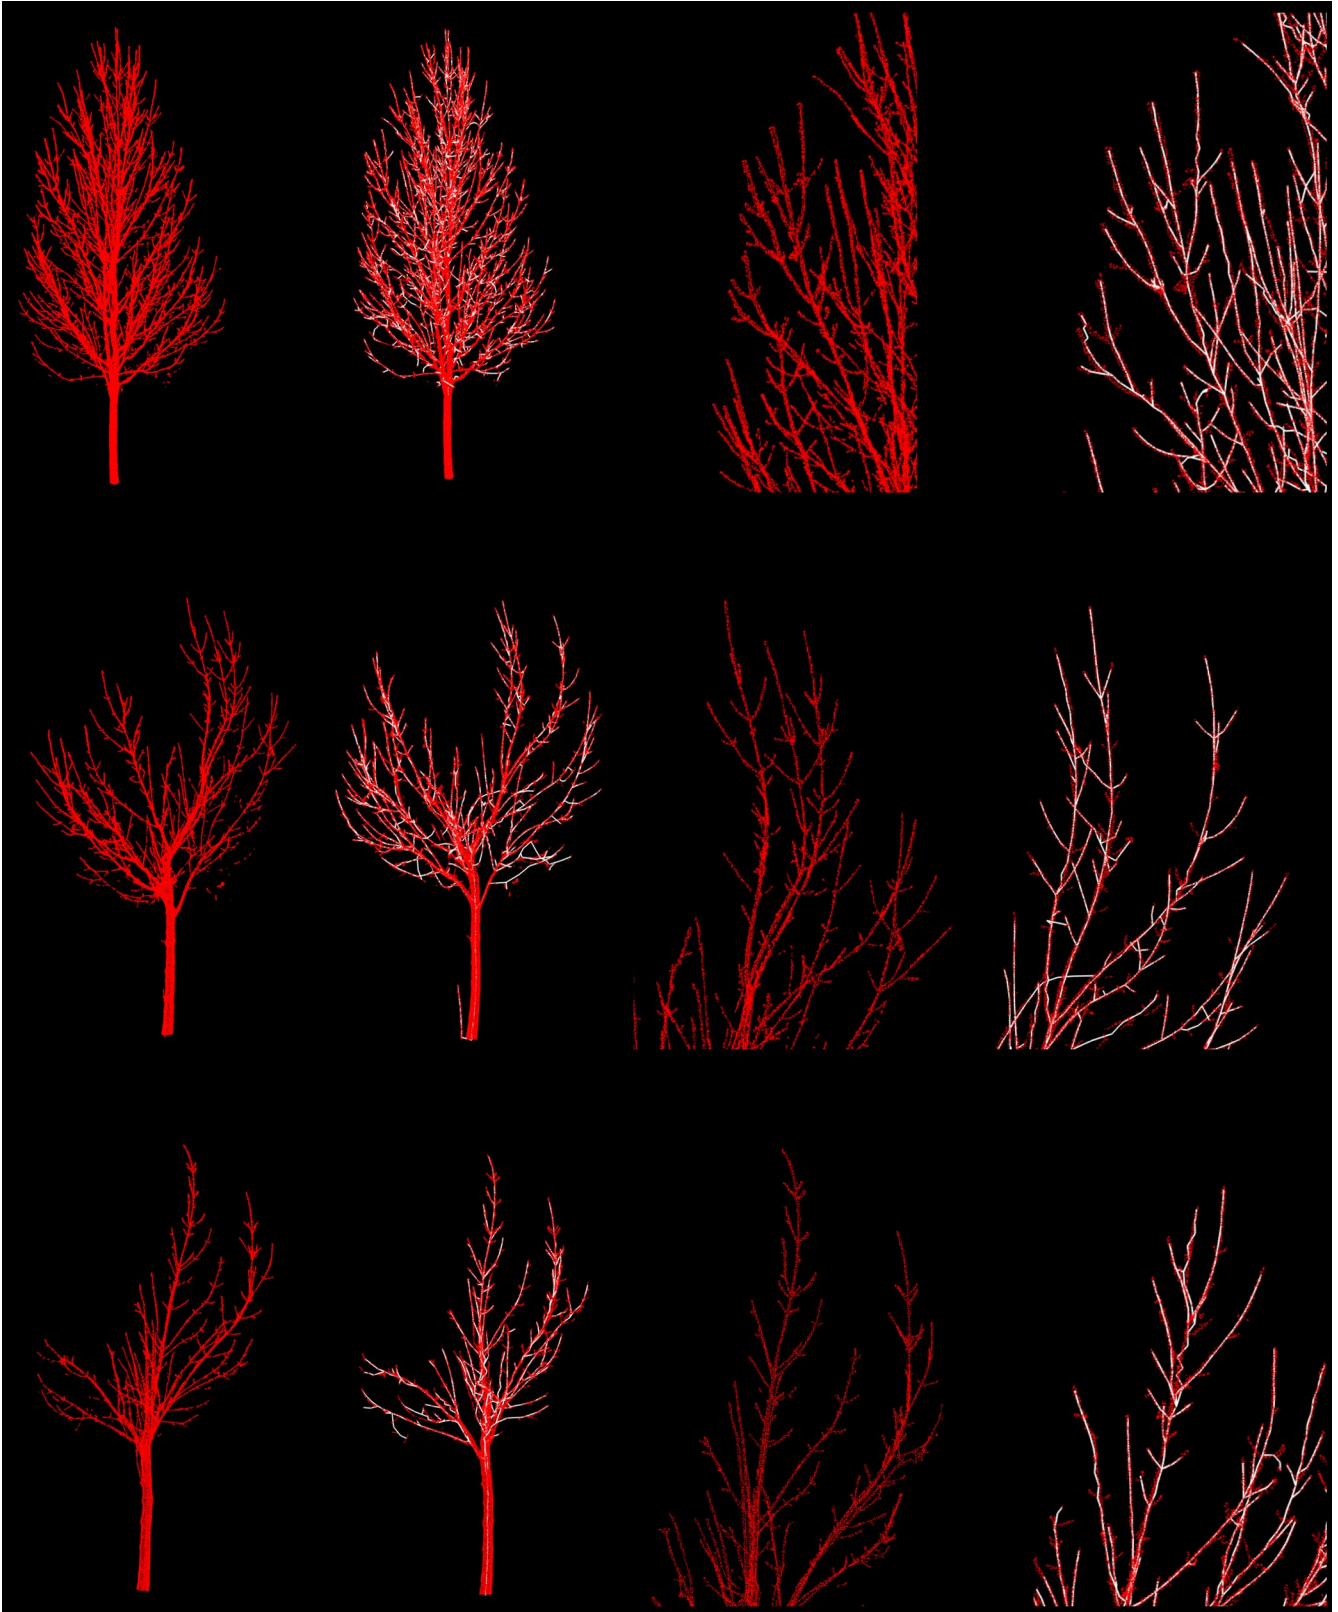

Supplement: s1 [file s1]
